# Supplementary material
Source: PubMed Central journal article supplement (PMC3716320)
Supplement: supp_mol.113.085696_Supplemental_Materials.pdf [file supp_mol.113.085696_Supplemental_Materials.pdf]

Emmanuel Kostakis, Conor Smith, Ming-Kuei Jang, Stella C. Martin, Kyle G. Richards, Shelley J. Russek, Terrell T. Gibbs And David H. Farb

## The Neuroactive Steroid Pregnenolone Sulfate Stimulates Trafficking of Functional NMDA Receptors to the Cell Surface via a Non-Canonical G-Protein and $Ca^{++}$ Dependent Mechanism

*Molecular Pharmacology*

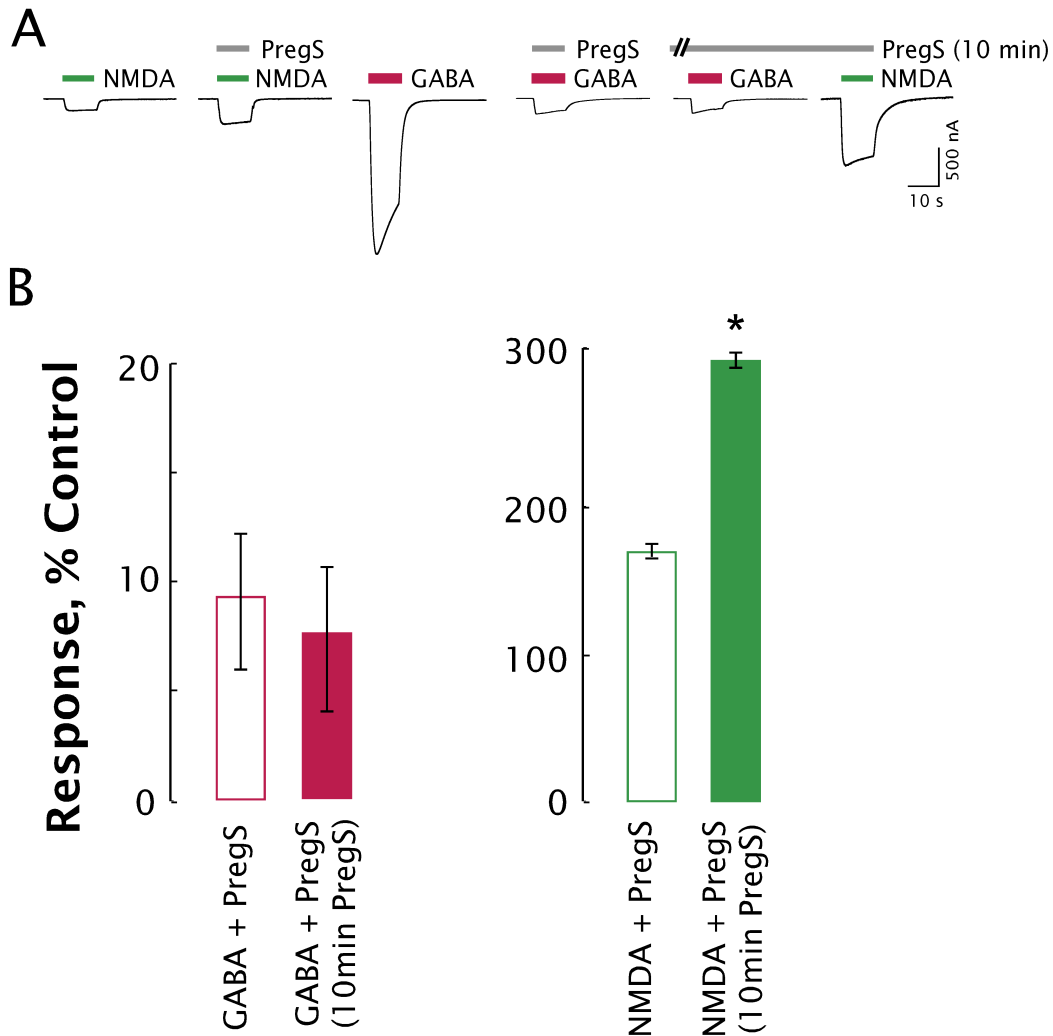

**Supplemental Figure 1. Delayed potentiation is NMDAR specific.** (A) Representative traces obtained from a *Xenopus* oocyte co-expressing NR1-1a/NR2A and  $\alpha 1\beta 2\gamma 2s$  receptors show typical responses to control applications of NMDA (300  $\mu$ M) or GABA (500  $\mu$ M), and applications of NMDA + PS and GABA + PS with or without a prolonged (10 min) pre-exposure to PS (100  $\mu$ M). (B) Averaged peak current responses to NMDA + PS without (open bars) or after (solid bars) 10 min pre-exposure to PS.  $V_h = -70$  mV. Responses are normalized to the response in the absence of PS (note that PS allosterically inhibits GABA responses but enhances NMDA responses). Statistical significance was assessed by 2-tail paired t-test. Error bars represent SEM.

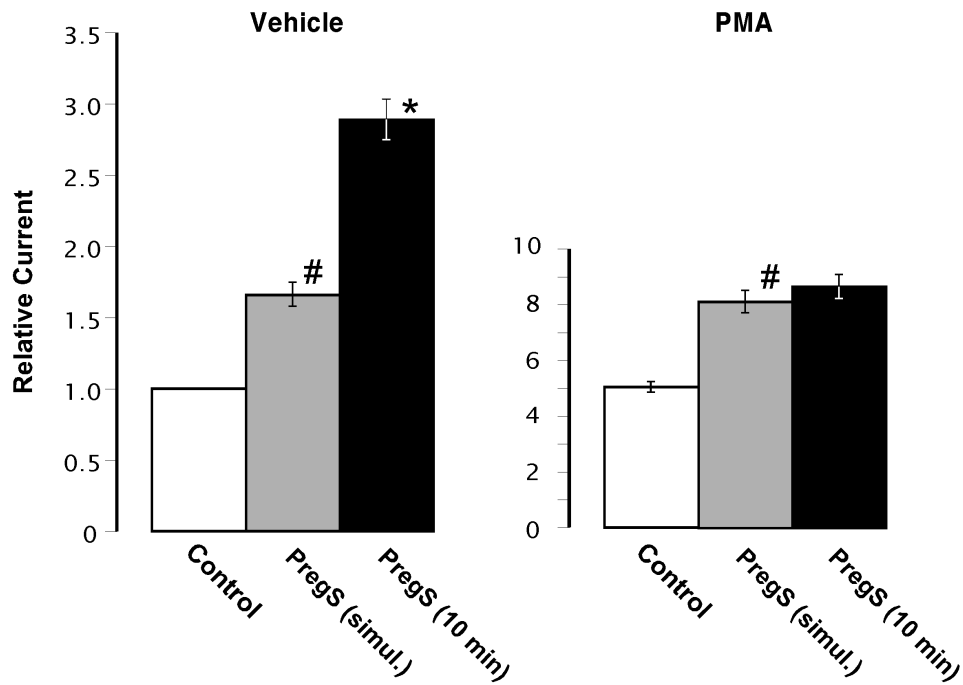

**Supplemental Figure. 2. Delayed potentiation is occluded by pretreatment with PMA.**

Response of oocytes expressing NR1-1a/NR2A receptors to 300  $\mu$ M NMDA is potentiated by treatment with PMA (2  $\mu$ M, 10 min). PMA-treated oocytes exhibit rapid potentiation by PregS, but delayed potentiation is absent. Left, vehicle treated oocytes, right, PMA treated (note difference in scale). Mean peak NMDA induced currents are expressed relative to the NMDA response prior to treatment with PMA and/or PregS. Error bars indicate s.e.m. Number of oocytes tested was 7 (vehicle) and 8 (PMA). # Significantly different from control.

\* Significantly different from simultaneous addition of NMDA and PregS ( $p < 0.001$ , paired 2-tail t-test).
